# Supplementary material for: Postdischarge Health Care Costs and Readmission in Patients With Hyperkalemia-Related Hospitalizations
Source: PubMed Central journal article supplement — Kidney Int Rep. 2020 Jun 11;5(8):1280–90. doi: 10.1016/j.ekir.2020.06.004 (PMC7403556; doi:10.1016/j.ekir.2020.06.004), 2020-06-11
Supplement: mmc1.pdf [file mmc1.pdf]

**SUPPLEMENTARY MATERIAL**

**Table S1. ICD-9-CM code for hyperkalemia-related comorbidities**

| <b>Hyperkalemia-related comorbidities</b> | <b>ICD-9-CM codes</b>                                                                                                                                  |
|-------------------------------------------|--------------------------------------------------------------------------------------------------------------------------------------------------------|
| Chronic kidney disease                    |                                                                                                                                                        |
| Stage 3                                   | 585.3                                                                                                                                                  |
| Stage 4                                   | 585.4                                                                                                                                                  |
| Stage 5 or end stage                      | 403.01, 403.11, 403.91, 404.02, 404.03, 404.12, 404.13, 404.92, 404.93                                                                                 |
| Stage 5                                   | 585.5                                                                                                                                                  |
| End stage                                 | 585.6                                                                                                                                                  |
| Unspecified                               | 403.00, 403.10, 403.90, 404.00, 404.01, 404.10, 404.11, 404.90, 404.91, 585.9                                                                          |
| Congestive heart failure                  | 398.91, 402.01, 402.11, 402.91, 404.01, 404.03, 404.11, 404.13, 404.91, 404.93, 425.4–425.9, 428                                                       |
| Diabetes                                  | 250.00, 250.02, 250.10, 250.12, 250.20, 250.30, 250.32, 250.40, 250.42, 250.50, 250.52, 250.60, 250.62, 250.70, 250.72, 250.80, 250.82, 250.90, 250.92 |
| Hypertension                              | 401, 402, 403, 404, 405, 437.2, 642.0, 642.1, 642.2, 642.7, 642.9                                                                                      |

**Abbreviation:** ICD-9-CM, International Classification of Diseases, 9<sup>th</sup> Revision, Clinical Modification.

**Table S2. Procedure codes for dialysis and hemodialysis**

| <b>Procedure</b>    | <b>CPT codes</b> | <b>HCPCS codes</b> | <b>ICD-9-CM procedure code</b> |
|---------------------|------------------|--------------------|--------------------------------|
| <b>Dialysis</b>     | 90945            | G0257              | 39.27                          |
|                     | 90947            | G0322              | 39.42                          |
|                     | 90957            | G0323              | 38.95                          |
|                     | 90958            | G0326              | 54.98                          |
|                     | 90959            | G0327              |                                |
|                     | 90960            | S9339              |                                |
|                     | 90961            |                    |                                |
|                     | 90962            |                    |                                |
|                     | 90965            |                    |                                |
|                     | 90966            |                    |                                |
|                     | 90969            |                    |                                |
|                     | 90970            |                    |                                |
|                     | 90999            |                    |                                |
|                     | 4055F            |                    |                                |
| <b>Hemodialysis</b> | 4052F-4054F      | S9335              | 39.95                          |
|                     | 90935            | G8081              |                                |
|                     | 90937            | G8082              |                                |
|                     | 99512            | G8085              |                                |
|                     |                  | G8714              |                                |
|                     |                  | G8715              |                                |
|                     |                  | G8956              |                                |
|                     |                  | G9264              |                                |
|                     |                  | G9265              |                                |
|                     |                  | G9266              |                                |

**Abbreviations:** CPT, Current Procedural Terminology; HCPCS, Healthcare Common Procedure Coding System;

ICD-9-CM, International Classification of Diseases, 9<sup>th</sup> Revision, Clinical Modification.
